# Supplementary material for: Characterization of Third Generation Cephalosporin- and Carbapenem-Resistant Aeromonas Isolates from Municipal and Hospital Wastewater
Source: MDPI journal article supplement (doi:10.3390/antibiotics12030513), 2023-03-03
Supplement: s1 [file s1]

***Supplementary Material for manuscript entitled***

**Characterization of third generation cephalosporin- and carbapenem-resistant *Aeromonas* isolates from municipal and hospital wastewater**

*Sara Drk<sup>a</sup>, Ana Puljko<sup>a</sup>, Mia Dželalija<sup>b</sup>, Nikolina Udiković-Kolić<sup>a, \*</sup>*

*<sup>a</sup> Division for Marine and Environmental Research, Ruđer Bošković Institute, Bijenička 54, P.O. Box 180, 10 002 Zagreb, Croatia*

*<sup>b</sup> Department of Biology, Faculty of Science, University of Split, Ruđera Boškovića 33, 21 000 Split, Croatia*

*\* Corresponding author: Dr. Nikolina Udiković-Kolić (nudikov@irb.hr), Division for Marine and Environmental Research, Ruđer Bošković Institute, Bijenička 54, P.O. Box 180; 10 002 Zagreb, Croatia, E-mail address: nudikov@irb.hr*

**Figure S1.** Dendrogram showing genetic relatedness of (A) 38 *Aeromonas caviae*, (B) 11 *Aeromonas hydrophila*, (C) 7 *Aeromonas media* and (D) 7 *Aeromonas veronii* strains determined by analysis of ERIC-PCR fingerprints using the Dice similarity coefficient and UPGMA clustering method.

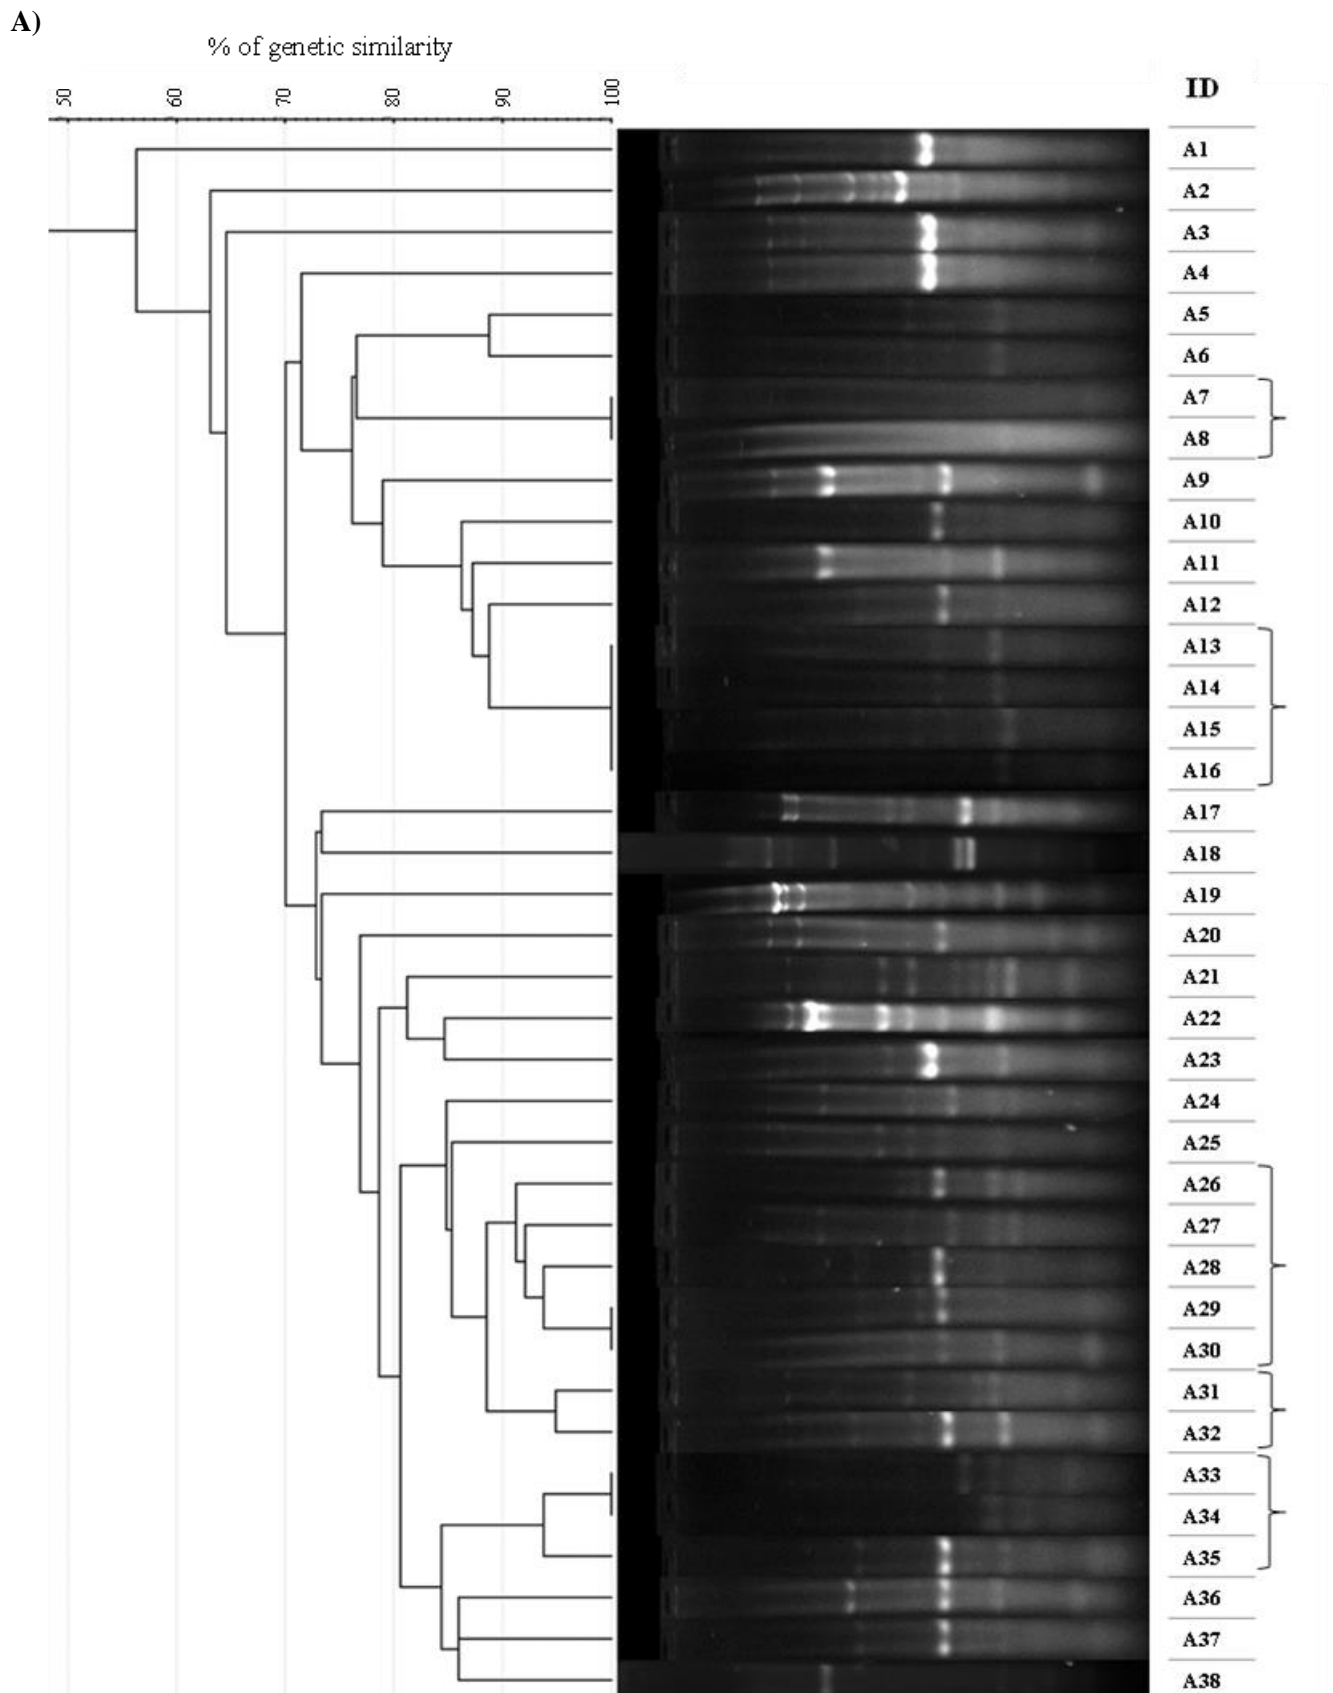

B)

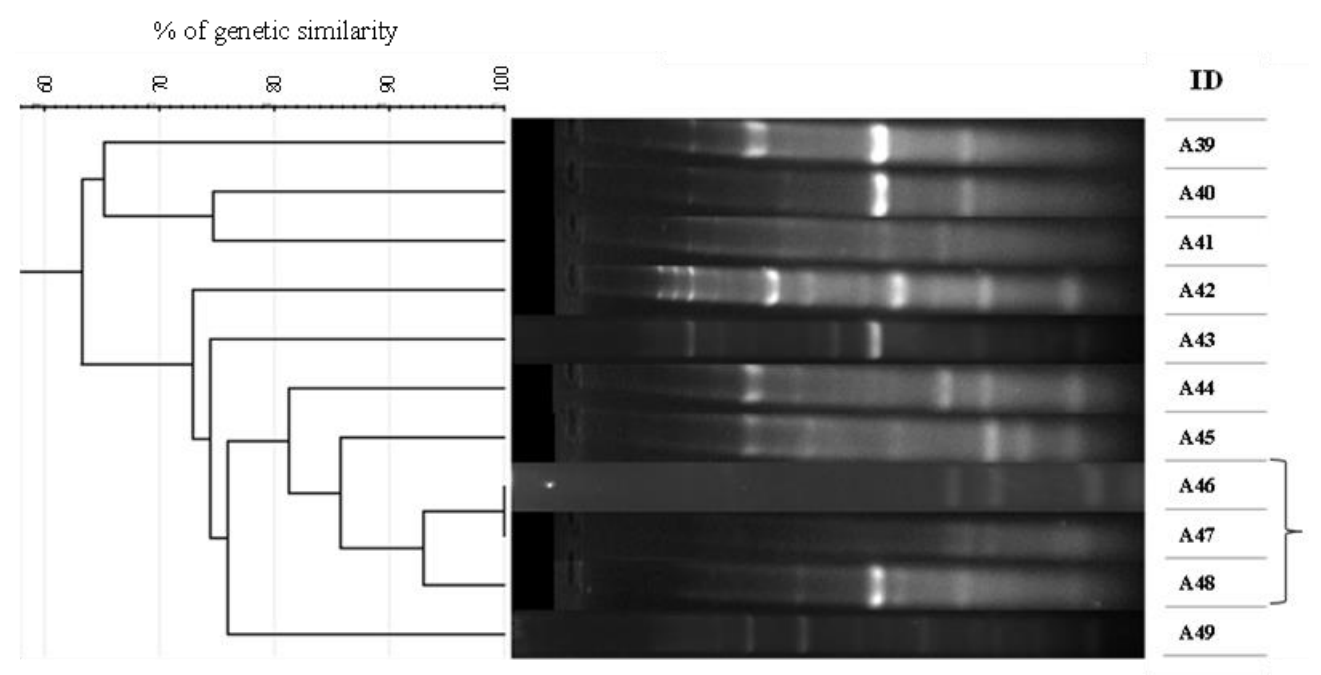

C)

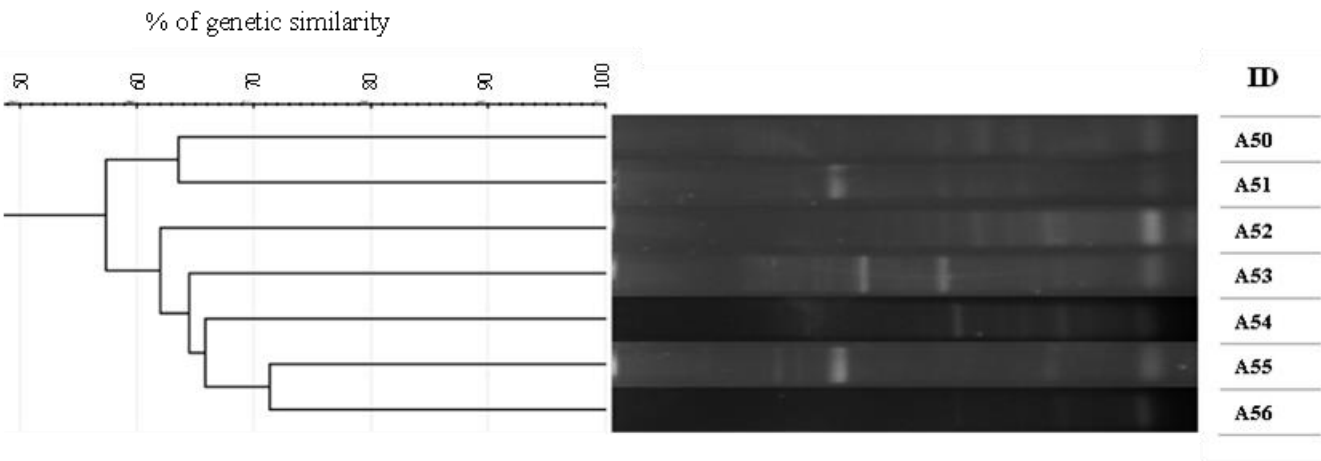

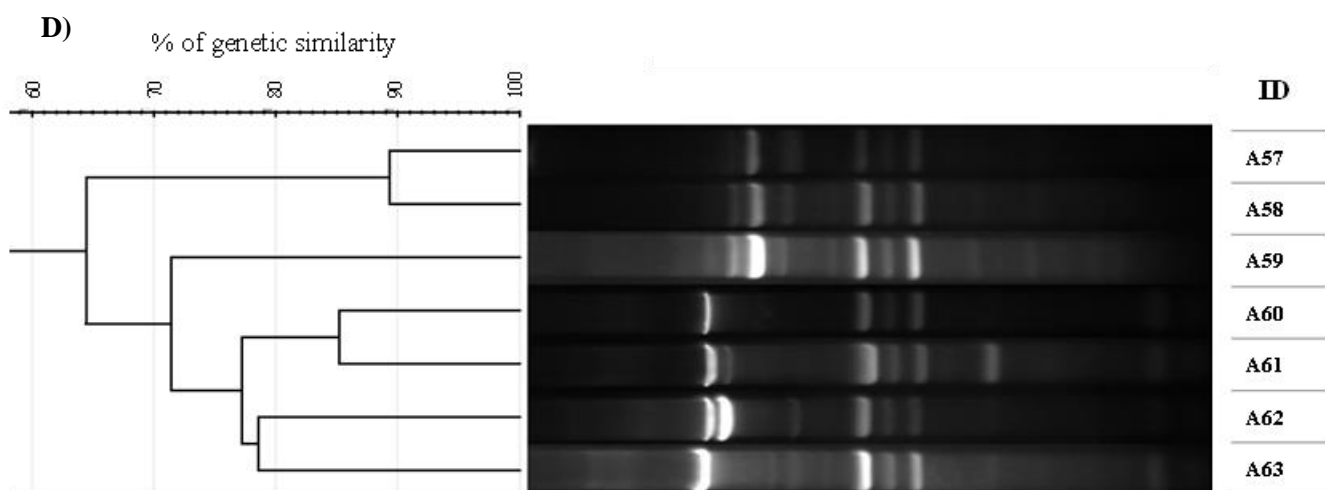

**Table S1.** Antimicrobial susceptibility patterns of *Aeromonas* isolates. AML = amoxicillin, AMC = amoxicillin/clavulanic acid, CL = cephalexin, CXM = cefuroxime, CAZ = ceftazidime, FEP = cefepime, ETP = ertapenem, IPM = imipenem, MEM = meropenem GM = gentamicin, SXT = trimethoprim/sulfamethoxazole, CIP = ciprofloxacin, COL = colistin, S = susceptible, R = resistant

| Antibiotics |   | <i>A. caviae</i>    | <i>A. hydrophila</i> | <i>A. media</i> | <i>A. veronii</i> | <i>A. salmonicida</i> | <i>A. rivipollensis</i> | <i>A. eucrenophila</i> | Total   |
|-------------|---|---------------------|----------------------|-----------------|-------------------|-----------------------|-------------------------|------------------------|---------|
|             |   | No. of isolates (%) |                      |                 |                   |                       |                         |                        |         |
| AML         | S | 0 (0)               | 0 (0)                | 0 (0)           | 1 (14)            | 0 (0)                 | 0 (0)                   | 0 (0)                  | 1 (2)   |
|             | R | 38 (100)            | 11 (100)             | 7 (100)         | 6 (86)            | 1 (100)               | 1 (100)                 | 1 (100)                | 65 (98) |
| AMC         | S | 2 (5)               | 0 (0)                | 1 (14)          | 0 (0)             | 0 (0)                 | 0 (0)                   | 1 (100)                | 4 (6)   |
|             | R | 36 (95)             | 11 (100)             | 6 (86)          | 7 (100)           | 1 (100)               | 1 (100)                 | 0 (0)                  | 62 (94) |
| CL          | S | 1 (3)               | 0 (0)                | 0 (0)           | 0 (0)             | 0 (0)                 | 0 (0)                   | 0 (0)                  | 1 (2)   |
|             | R | 37 (97)             | 11 (100)             | 7 (100)         | 7 (100)           | 1 (100)               | 1 (100)                 | 1 (100)                | 65 (98) |
| CXM         | S | 1 (3)               | 1 (9)                | 1 (14)          | 1 (14)            | 0 (0)                 | 0 (0)                   | 0 (0)                  | 4 (6)   |
|             | R | 37 (97)             | 10 (91)              | 6 (86)          | 6 (86)            | 1 (100)               | 1 (100)                 | 1 (100)                | 62 (94) |
| CAZ         | S | 5 (13)              | 1 (9)                | 1 (14)          | 2 (29)            | 0 (0)                 | 1 (100)                 | 1 (100)                | 11 (17) |
|             | R | 33 (87)             | 10 (91)              | 6 (86)          | 5 (71)            | 1 (100)               | 0 (0)                   | 0 (0)                  | 55 (83) |
| FEP         | S | 4 (11)              | 3 (27)               | 2 (29)          | 2 (29)            | 0 (0)                 | 1 (100)                 | 1 (100)                | 13 (20) |
|             | R | 34 (89)             | 8 (73)               | 5 (71)          | 5 (71)            | 1 (100)               | 0 (0)                   | 0 (0)                  | 53 (80) |
| ETP         | S | 1 (3)               | 1 (9)                | 1 (14)          | 0 (0)             | 0 (0)                 | 0 (0)                   | 1 (100)                | 4 (6)   |
|             | R | 37 (97)             | 10 (91)              | 6 (86)          | 7 (100)           | 1 (100)               | 1 (100)                 | 0 (0)                  | 62 (94) |
| IPM         | S | 9 (24)              | 2 (18)               | 1 (14)          | 0 (0)             | 0 (0)                 | 1 (100)                 | 1 (100)                | 14 (21) |
|             | R | 29 (76)             | 9 (82)               | 6 (86)          | 7 (100)           | 1 (100)               | 0 (0)                   | 0 (0)                  | 52 (79) |
| MEM         | S | 10 (26)             | 2 (18)               | 1 (14)          | 0 (0)             | 0 (0)                 | 1 (100)                 | 1 (100)                | 15 (23) |
|             | R | 28 (74)             | 9 (82)               | 6 (86)          | 7 (100)           | 1 (100)               | 0 (0)                   | 0 (0)                  | 51 (77) |
| GM          | S | 25 (66)             | 8 (73)               | 5 (71)          | 2 (29)            | 1 (100)               | 1 (100)                 | 1 (100)                | 43 (65) |
|             | R | 13 (34)             | 3 (27)               | 2 (29)          | 5 (71)            | 0 (0)                 | 0 (0)                   | 0 (0)                  | 23 (35) |
| SXT         | S | 24 (63)             | 6 (55)               | 5 (71)          | 3 (43)            | 1 (100)               | 1 (100)                 | 1 (100)                | 41 (62) |
|             | R | 14 (37)             | 5 (45)               | 2 (29)          | 4 (57)            | 0 (0)                 | 0 (0)                   | 0 (0)                  | 25 (38) |
| CIP         | S | 6 (16)              | 2 (18)               | 4 (57)          | 0 (0)             | 1 (100)               | 1 (100)                 | 1 (100)                | 15 (23) |
|             | R | 32 (84)             | 9 (82)               | 3 (43)          | 7 (100)           | 0 (0)                 | 0 (0)                   | 0 (0)                  | 51 (77) |
| COL         | S | 30 (79)             | 8 (73)               | 7 (100)         | 6 (86)            | 1 (100)               | 1 (100)                 | 0 (0)                  | 53 (80) |
|             | R | 8 (21)              | 3 (27)               | 0 (0)           | 1 (14)            | 0 (0)                 | 0 (0)                   | 1 (100)                | 13 (20) |

Table S2. Specific primers and conditions used in plasmid replicon typing.

| Replicon     | Primer name | Primer nucleotide sequence (5' - 3') | Amplicon size (bp) | PCR conditions                                                                                                                                                                                      | Reference |                                                                                                                                                                  |
|--------------|-------------|--------------------------------------|--------------------|-----------------------------------------------------------------------------------------------------------------------------------------------------------------------------------------------------|-----------|------------------------------------------------------------------------------------------------------------------------------------------------------------------|
| HI1          | HI1f        | GGAGCGATGGATTACTTCAGTAC              | 471                | Initial denaturation step at 94°C for 5 min;<br>30 cycles of<br>94°C for 1 min,<br>annealing temperature:<br>60°C (52°C for FrepB) for 30 sec;<br>72°C for 1 min;<br>final extension 72°C for 5 min | [64]      |                                                                                                                                                                  |
|              | HI1r        | TGCCGTTTCACCTCGTGAGTA                |                    |                                                                                                                                                                                                     |           |                                                                                                                                                                  |
| HI2          | HI2f        | TTTCTCCTGAGTCACCTGTTAACAC            | 644                |                                                                                                                                                                                                     |           |                                                                                                                                                                  |
|              | HI2r        | GGCTCACTACCGTTGTCATCCT               |                    |                                                                                                                                                                                                     |           |                                                                                                                                                                  |
| I1-Iy        | I1f         | CGAAAGCCGGACGGCAGAA                  | 139                |                                                                                                                                                                                                     |           |                                                                                                                                                                  |
|              | I1r         | TCGTGCTTCCGCCAAGTTCGT                |                    |                                                                                                                                                                                                     |           |                                                                                                                                                                  |
| X            | Xf          | AACCTTAGAGGCTATTTAAGTTGCTGAT         | 376                |                                                                                                                                                                                                     |           |                                                                                                                                                                  |
|              | Xr          | TGAGAGTCAATTTTTATCTCATGTTTTAGC       |                    |                                                                                                                                                                                                     |           |                                                                                                                                                                  |
| L/M          | L/Mf        | GGATGAAAACATCAGCATCTGAAG             | 785                |                                                                                                                                                                                                     |           |                                                                                                                                                                  |
|              | L/Mr        | CTGCAGGGGCGATTCTTTAGG                |                    |                                                                                                                                                                                                     |           |                                                                                                                                                                  |
| N            | Nf          | GTCTAACGAGCTTACCGAAG                 | 559                |                                                                                                                                                                                                     |           |                                                                                                                                                                  |
|              | Nr          | GTTTCAACTCTGCCAAGTTC                 |                    |                                                                                                                                                                                                     |           |                                                                                                                                                                  |
| FIA          | FIAf        | CCATGCTGGTTCTAGAGAAGGTG              | 462                |                                                                                                                                                                                                     |           |                                                                                                                                                                  |
|              | FIAr        | GTATATCCTTACTGGCTTCCGCAG             |                    |                                                                                                                                                                                                     |           |                                                                                                                                                                  |
| FIB          | FIBf        | GGAGTTC TGACACACGATTTTCTG            | 702                |                                                                                                                                                                                                     |           |                                                                                                                                                                  |
|              | FIBr        | CTCCCGTCGCTTCAGGGCATT                |                    |                                                                                                                                                                                                     |           |                                                                                                                                                                  |
| W            | Wf          | CCTAAGAACAACAAAGCCCCCG               | 242                |                                                                                                                                                                                                     |           |                                                                                                                                                                  |
|              | Wr          | GGTGCGCGGCATAGAACCGT                 |                    |                                                                                                                                                                                                     |           |                                                                                                                                                                  |
| Y            | Yf          | AATTCAAACAACACTGTGCAGCCTG            | 765                |                                                                                                                                                                                                     |           |                                                                                                                                                                  |
|              | Yr          | GCGAGAATGGACGATTACAAAACTTT           |                    |                                                                                                                                                                                                     |           |                                                                                                                                                                  |
| P            | Pf          | CTATGGCCCTGCAAACGCGCCAGAAA           | 534                |                                                                                                                                                                                                     |           |                                                                                                                                                                  |
|              | Pr          | TCACGCGCCAGGGCGCAGCC                 |                    |                                                                                                                                                                                                     |           |                                                                                                                                                                  |
| FIC          | FICf        | GTGAACTGGCAGATGAGGAAGG               | 262                |                                                                                                                                                                                                     |           |                                                                                                                                                                  |
|              | FICr        | TTCTCCTCGTCGCCAAACTAGAT              |                    |                                                                                                                                                                                                     |           |                                                                                                                                                                  |
| A/C          | A/Cf        | GAGAACCAAAGACAAAGACCTGGA             | 465                |                                                                                                                                                                                                     |           |                                                                                                                                                                  |
|              | A/Cr        | ACGACAAACCTGAATTGCCTCCTT             |                    |                                                                                                                                                                                                     |           |                                                                                                                                                                  |
| T            | Tf          | TTGGCCTGTTTGTGCCTAAACCAT             | 750                |                                                                                                                                                                                                     |           |                                                                                                                                                                  |
|              | Tr          | CGTTGATTACACTTAGCTTTGGAC             |                    |                                                                                                                                                                                                     |           |                                                                                                                                                                  |
| FIIs         | FIIsf       | CTGTCGTAAGCTGATGGC                   | 270                |                                                                                                                                                                                                     |           |                                                                                                                                                                  |
|              | FIIsr       | CTCTGCCACAAACTTCAGC                  |                    |                                                                                                                                                                                                     |           |                                                                                                                                                                  |
| K            | K/Bf        | GCGGTCCGGAAGCCAGAAAAAC               | 160                |                                                                                                                                                                                                     |           |                                                                                                                                                                  |
|              | Kr          | TCTTTCACGAGCCCGCCAAA                 |                    |                                                                                                                                                                                                     |           |                                                                                                                                                                  |
| B/O          | K/Bf        | GCGGTCCGGAAGCCAGAAAAAC               | 159                |                                                                                                                                                                                                     |           |                                                                                                                                                                  |
|              | B/Or        | TCTGCGTTCCGCCAAGTTCGA                |                    |                                                                                                                                                                                                     |           |                                                                                                                                                                  |
| FrepB        | FrepBf      | TGATCGTTTAAGGAATTTTG                 | 270                |                                                                                                                                                                                                     |           |                                                                                                                                                                  |
|              | FrepBr      | GAAGATCAGTCACACCATCC                 |                    |                                                                                                                                                                                                     |           |                                                                                                                                                                  |
| ColE         | oricolEf    | GTTCGTGCATACAGTCCA                   | 187                | Initial denaturation step at 94°C for 5 min; 30 cycles of 94°C for 1 min, annealing temperature: 57°C for 30 sec; 72°C for 1 min; final extension 72°C for 5 min                                    | [65]      |                                                                                                                                                                  |
|              | oricolEr    | GGCGAAACCCGACAGGACT                  |                    |                                                                                                                                                                                                     |           |                                                                                                                                                                  |
| R            | IncRf       | TCGCTTCATTCTGCTTCAGC                 | 251                |                                                                                                                                                                                                     |           | Initial denaturation step at 94°C for 5 min; 30 cycles of 94°C for 1 min, annealing temperature: 62°C for 30 sec; 72°C for 1 min; final extension 72°C for 5 min |
|              | IncRr       | GTGTGCTGTGGTTATGCCTCA                |                    |                                                                                                                                                                                                     |           |                                                                                                                                                                  |
| U            | IncUf       | TCACGACACAAGCGCAAGGG                 | 843                |                                                                                                                                                                                                     |           |                                                                                                                                                                  |
|              | IncUr       | TCATGGTACATCTGGGCGC                  |                    |                                                                                                                                                                                                     |           |                                                                                                                                                                  |
| L/M (OXA-48) | RepA-A      | GACATTGAGTCAGTAGAAGG                 | 925                | Initial denaturation step at 94°C for 2:30 min; 35 cycles of 94°C for 25 sec, annealing temperature: 55°C for 25 sec; 72°C for 1 min; final extension 72°C for 2 min                                | [66]      |                                                                                                                                                                  |
|              | RepA-B      | CGTGCAGTTCGTCTTTCGGC                 |                    |                                                                                                                                                                                                     |           |                                                                                                                                                                  |
|              | TraU-A      | ATCTACGCAATCTTACGTC                  | 577                |                                                                                                                                                                                                     |           |                                                                                                                                                                  |
|              | TraU-B      | TCGCGTCATGCGTGATCTTC                 |                    |                                                                                                                                                                                                     |           |                                                                                                                                                                  |
|              | ParA-A      | GCAGTCAAAACGTTGATCAG                 | 532                |                                                                                                                                                                                                     |           |                                                                                                                                                                  |
|              | ParA-B      | GATCGCAATGCGTCTTGGTG                 |                    |                                                                                                                                                                                                     |           |                                                                                                                                                                  |

Table S3. Identification of *Aeromonas* strains by MALDI-TOF MS and/or 16S rRNA gene sequencing. Red letters indicate discrepancies between MALDI-TOF MS and 16S identification. ID represents the isolate designation; TWW and H refer to the source of bacterial isolation, treated municipal wastewater and hospital wastewater, respectively. ND, not determined.

| GenBank accession number | ID        | MALDI-TOF MS                | Score values <sup>1</sup> | Symbol <sup>1</sup> | Consistency <sup>2</sup> | 16S identification          | Identities      |
|--------------------------|-----------|-----------------------------|---------------------------|---------------------|--------------------------|-----------------------------|-----------------|
| OQ532942                 | A36 (TWW) | <i>Aeromonas caviae</i>     | 2.212                     | (++)                | B                        | <i>Aeromonas caviae</i>     | 886/886 (100 %) |
| OQ532917                 | A1 (TWW)  | <i>Aeromonas</i> sp.        | 1.523                     | (-)                 | C                        | <i>Aeromonas caviae</i>     | 796/799 (99 %)  |
| OQ532944                 | A4 (TWW)  | <i>Aeromonas caviae</i>     | 2.109                     | (++)                | B                        | <i>Aeromonas hydrophila</i> | 864/868 (99 %)  |
| OQ532936                 | A9 (TWW)  | <i>Aeromonas caviae</i>     | 2.06                      | (++)                | A                        | <i>Aeromonas caviae</i>     | 848/858 (99 %)  |
| OQ532945                 | A11 (TWW) | <i>Aeromonas caviae</i>     | 2.236                     | (++)                | B                        | <i>Aeromonas caviae</i>     | 863/865 (99 %)  |
| OQ532932                 | A23 (TWW) | <i>Aeromonas caviae</i>     | 2.172                     | (++)                | A                        | <i>Aeromonas hydrophila</i> | 727/727 (100 %) |
| OQ532946                 | A3 (TWW)  | <i>Aeromonas caviae</i>     | 2.227                     | (++)                | A                        | <i>Aeromonas caviae</i>     | 865/866 (99 %)  |
| OQ532948                 | A20 (TWW) | <i>Aeromonas caviae</i>     | 2.117                     | (++)                | A                        | <i>Aeromonas caviae</i>     | 876/879 (99 %)  |
| OQ532949                 | A31 (TWW) | <i>Aeromonas caviae</i>     | 2.286                     | (++)                | A                        | <i>Aeromonas caviae</i>     | 931/940 (99 %)  |
| OQ532955                 | A6 (TWW)  | <i>Aeromonas caviae</i>     | 2.11                      | (++)                | A                        | <i>Aeromonas caviae</i>     | 869/873 (99 %)  |
| OQ532927                 | A19 (TWW) | <i>Aeromonas caviae</i>     | 2.213                     | (++)                | B                        | <i>Aeromonas caviae</i>     | 949/952 (99 %)  |
| OQ532940                 | A30 (TWW) | <i>Aeromonas caviae</i>     | 2.09                      | (++)                | B                        | <i>Aeromonas hydrophila</i> | 883/886 (99 %)  |
| OQ532931                 | A2 (TWW)  | <i>Aeromonas caviae</i>     | 2.18                      | (++)                | B                        | <i>Aeromonas caviae</i>     | 819/821 (99 %)  |
| OQ532930                 | A15 (TWW) | <i>Aeromonas caviae</i>     | 2.27                      | (++)                | A                        | <i>Aeromonas caviae</i>     | 815/819 (99 %)  |
| OQ532935                 | A32 (TWW) | <i>Aeromonas caviae</i>     | 2.148                     | (++)                | B                        | <i>Aeromonas caviae</i>     | 874/883 (99%)   |
| OQ532913                 | A38 (TWW) | <i>Aeromonas</i> sp.        | 1.664                     | (-)                 | C                        | <i>Aeromonas caviae</i>     | 607/607 (100%)  |
| OQ532915                 | A8 (TWW)  | <i>Aeromonas</i> sp.        | 1.672                     | (-)                 | C                        | <i>Aeromonas caviae</i>     | 590/590 (100 %) |
| OQ532958                 | A18 (H)   | <i>Aeromonas caviae</i>     | 2.156                     | (++)                | A                        | <i>Aeromonas caviae</i>     | 614/615 (99 %)  |
| OQ532947                 | A21 (TWW) | <i>Aeromonas caviae</i>     | 2.123                     | (++)                | B                        | <i>Aeromonas caviae</i>     | 966/969 (99 %)  |
| OQ532938                 | A12 (TWW) | <i>Aeromonas caviae</i>     | 2.067                     | (++)                | B                        | <i>Aeromonas caviae</i>     | 873/876 (99 %)  |
| OQ532933                 | A35 (TWW) | <i>Aeromonas caviae</i>     | 2.039                     | (++)                | A                        | <i>Aeromonas caviae</i>     | 865/865 (100 %) |
| OQ532934                 | A37 (TWW) | <i>Aeromonas caviae</i>     | 2.087                     | (++)                | B                        | <i>Aeromonas caviae</i>     | 856/857 (99 %)  |
| OQ532941                 | A29 (TWW) | <i>Aeromonas caviae</i>     | 2.019                     | (++)                | A                        | <i>Aeromonas caviae</i>     | 935/940 (99 %)  |
| OQ532952                 | A28 (TWW) | <i>Aeromonas caviae</i>     | 2.264                     | (++)                | B                        | <i>Aeromonas caviae</i>     | 864/865 (100 %) |
| OQ532953                 | A10 (TWW) | <i>Aeromonas caviae</i>     | 2.24                      | (++)                | B                        | <i>Aeromonas caviae</i>     | 882/884 (99 %)  |
| OQ532961                 | A24(TWW)  | <i>Aeromonas caviae</i>     | 2.028                     | (++)                | B                        | <i>Aeromonas caviae</i>     | 864/869 (99 %)  |
| OQ532920                 | A14 (TWW) | <i>Aeromonas</i> sp.        | 1.465                     | (-)                 | C                        | <i>Aeromonas caviae</i>     | 755/756 (99 %)  |
|                          | A22 (TWW) | <i>Aeromonas caviae</i>     | 2.122                     | (++)                | B                        | ND                          |                 |
|                          | A26 (TWW) | <i>Aeromonas caviae</i>     | 2.031                     | (++)                | B                        | ND                          |                 |
| OQ532960                 | A34 (TWW) | <i>Aeromonas caviae</i>     | 2.366                     | (++)                | B                        | <i>Aeromonas caviae</i>     | 870/878 (99 %)  |
|                          | A5 (TWW)  | <i>Aeromonas caviae</i>     | 2.096                     | (++)                | B                        | ND                          |                 |
| OQ532925                 | A13 (TWW) | <i>Aeromonas</i> sp.        | 1.61                      | (-)                 | C                        | <i>Aeromonas caviae</i>     | 909/915 (99 %)  |
|                          | A17 (TWW) | <i>Aeromonas caviae</i>     | 2.151                     | (++)                | B                        | ND                          |                 |
|                          | A33 (TWW) | <i>Aeromonas caviae</i>     | 2.067                     | (++)                | A                        | ND                          |                 |
| OQ532924                 | A27 (TWW) | <i>Aeromonas</i> sp.        | 1.669                     | (-)                 | C                        | <i>Aeromonas caviae</i>     | 910/914 (99%)   |
|                          | A7 (TWW)  | <i>Aeromonas caviae</i>     | 2.166                     | (++)                | B                        | ND                          |                 |
| OQ532911                 | A16 (TWW) | <i>Aeromonas</i> sp.        | 1.68                      | (-)                 | C                        | <i>Aeromonas caviae</i>     | 533/533 (100 %) |
|                          | A25 (TWW) | <i>Aeromonas caviae</i>     | 2.259                     | (++)                | A                        | ND                          |                 |
| OQ532956                 | A39 (TWW) | <i>Aeromonas hydrophila</i> | 2.058                     | (++)                | A                        | <i>Aeromonas hydrophila</i> | 870/876 (99 %)  |
| OQ532957                 | A40 (TWW) | <i>Aeromonas hydrophila</i> | 2.014                     | (++)                | B                        | <i>Aeromonas hydrophila</i> | 882/888 (99 %)  |
| OQ532943                 | A42 (TWW) | <i>Aeromonas hydrophila</i> | 2.03                      | (++)                | B                        | <i>Aeromonas hydrophila</i> | 869/871 (99 %)  |
| OQ532950                 | A45 (TWW) | <i>Aeromonas hydrophila</i> | 2.238                     | (++)                | B                        | <i>Aeromonas hydrophila</i> | 949/955 (99 %)  |
| OQ532928                 | A48 (TWW) | <i>Aeromonas hydrophila</i> | 2.169                     | (++)                | B                        | <i>Aeromonas hydrophila</i> | 948/953 (99 %)  |
| OQ532939                 | A49 (TWW) | <i>Aeromonas hydrophila</i> | 2.062                     | (++)                | A                        | <i>Aeromonas hydrophila</i> | 935/940 (99 %)  |
| OQ532954                 | A41 (TWW) | <i>Aeromonas hydrophila</i> | 2.199                     | (++)                | A                        | <i>Aeromonas hydrophila</i> | 884/889 (99 %)  |
| OQ532923                 | A46 (TWW) | <i>Aeromonas</i> sp.        | 1.676                     | (-)                 | C                        | <i>Aeromonas hydrophila</i> | 916/916 (100 %) |
|                          | A47 (TWW) | <i>Aeromonas hydrophila</i> | 2.15                      | (++)                | B                        | ND                          |                 |
|                          | A44 (TWW) | <i>Aeromonas hydrophila</i> | 2.281                     | (++)                | A                        | ND                          |                 |
|                          | A43 (H)   | <i>Aeromonas hydrophila</i> | 2.143                     | (++)                | B                        | ND                          |                 |
| OQ532916                 | A51 (TWW) | <i>Aeromonas</i> sp.        | 1.617                     | (-)                 | C                        | <i>Aeromonas media</i>      | 800/800 (100 %) |
| OQ532918                 | A50 (TWW) | <i>Aeromonas</i> sp.        | 1.652                     | (-)                 | C                        | <i>Aeromonas media</i>      | 873/875 (99 %)  |
| OQ532937                 | A56 (TWW) | <i>Aeromonas media</i>      | 2.021                     | (++)                | A                        | <i>Aeromonas media</i>      | 950/950 (100 %) |
| OQ532951                 | A55 (TWW) | <i>Aeromonas media</i>      | 2.035                     | (++)                | A                        | <i>Aeromonas media</i>      | 884/886 (99 %)  |
| OQ532959                 | A54 (TWW) | <i>Aeromonas media</i>      | 2.018                     | (++)                | A                        | <i>Aeromonas media</i>      | 785/787 (99 %)  |
| OQ532922                 | A52 (TWW) | <i>Aeromonas</i> sp.        | 1.512                     | (-)                 | C                        | <i>Aeromonas media</i>      | 755/755 (100 %) |
| OQ532921                 | A53 (TWW) | <i>Aeromonas</i> sp.        | 1.51                      | (-)                 | C                        | <i>Aeromonas media</i>      | 605/605 (100 %) |

Table S3. Continued

| GenBank accession number | ID        | MALDI-TOF MS                  | Score values | Symbol | Consistency | 16S identification             | Identities      |
|--------------------------|-----------|-------------------------------|--------------|--------|-------------|--------------------------------|-----------------|
| OQ532912                 | A63 (TWW) | <i>Aeromonas</i> sp.          | 1.401        | (-)    | C           | <i>Aeromonas veronii</i>       | 616/616 (100 %) |
| OQ532919                 | A60 (H)   | <i>Aeromonas</i> sp.          | 1.623        | (-)    | C           | <i>Aeromonas veronii</i>       | 806/806 (100 %) |
|                          | A62 (H)   | <i>Aeromonas veronii</i>      | 2.191        | (++)   | B           | ND                             |                 |
|                          | A57 (H)   | <i>Aeromonas veronii</i>      | 2.31         | (++)   | A           | ND                             |                 |
|                          | A58 (H)   | <i>Aeromonas veronii</i>      | 2.181        | (++)   | B           | ND                             |                 |
|                          | A59 (H)   | <i>Aeromonas veronii</i>      | 2.091        | (++)   | B           | ND                             |                 |
| OQ532914                 | A61 (TWW) | <i>Aeromonas</i> sp.          | 1.618        | (-)    | C           | <i>Aeromonas veronii</i>       | 519/519 (100 %) |
| OQ532929                 | A64 (TWW) | <i>Aeromonas salmonicida</i>  | 2.188        | (++)   | B           | <i>Aeromonas media</i>         | 821/824 (99 %)  |
| OQ532926                 | A65 (TWW) | <i>Aeromonas</i> sp.          | 1.632        | (-)    | C           | <i>Aeromonas rivipollensis</i> | 668/671 (99 %)  |
|                          | A66 (TWW) | <i>Aeromonas eucrenophila</i> | 2.072        | (++)   | B           | ND                             |                 |

<sup>1</sup>Meaning of score values

| Range       | Interpretation                                               | Symbols |
|-------------|--------------------------------------------------------------|---------|
| 2.300-3.000 | High probable species identification                         | (+++)   |
| 2.000-2.299 | Secure genus identification, probable species identification | (++)    |
| 1.700-1.999 | Probable genus identification                                | (+)     |
| 0.000-1.699 | Not reliable identification                                  | (-)     |

<sup>2</sup>Meaning of consistency categories

| Category | Description         |
|----------|---------------------|
| A        | Species consistency |
| B        | Genus consistency   |
| C        | No consistency      |
